# Supplementary material
Source: PubMed Central journal article supplement (PMC3943652)
Supplement: NIHMS535688-supplement-01.pdf [file NIHMS535688-supplement-01.pdf]

| Strain | Description                                                   | Reference |
|--------|---------------------------------------------------------------|-----------|
| RK103  | MG1655 $\Delta ccm$                                           | (2)       |
| RK111  | MG1655 $\Delta ccm$ <i>cyt c4</i> :His6 chromosomal integrate | (1)       |

| Plasmid | Short name                   | Description                                      | Reference |
|---------|------------------------------|--------------------------------------------------|-----------|
| pRGK385 | pSysI $\Delta GH$            | pGEX <i>ccmABCDEF</i> :His6                      | (3)       |
| pRGK386 | pSysI                        | pGEX <i>ccmABCDEF</i> :His6GH                    | (3)       |
| pRGK387 | pSysI $\Delta EGH$           | pGEX <i>ccmABCDEF</i> :His6                      | (3)       |
| pRGK388 | --                           | pBAD <i>ccmF</i> :His6GH                         | (3)       |
| pRGK402 | pSysI $\Delta FGH$           | pGEX <i>ccmABCDE</i>                             | (1)       |
| pRGK427 | pSysI $\Delta GH$ delAB      | pGEX <i>ccmCDEF</i> :His6                        | This work |
| pRGK428 | pSysI $\Delta GH$ mutE       | pGEX <i>ccmABCDE</i> (His130Ala) <i>F</i> :His6  | This work |
| pRGK429 | pSysI $\Delta GH$ P-His1Ala  | pGEX <i>ccmABCDEF</i> (His173Ala):His6           | This work |
| pRGK430 | pSysI $\Delta GH$ TM-His1Ala | pGEX <i>ccmABCDEF</i> (His261Ala):His6           | This work |
| pRGK431 | pSysI $\Delta GH$ P-His2Ala  | pGEX <i>ccmABCDEF</i> (His303Ala):His6           | This work |
| pRGK432 | pSysI $\Delta GH$ TM-His2Ala | pGEX <i>ccmABCDEF</i> (His491Ala):His6           | This work |
| pRGK433 | pSysI $\Delta GH$ Dbl P-His  | pGEX <i>ccmABCDEF</i> (His173Ala/His303Ala):His6 | This work |
| pRGK434 | --                           | pBAD <i>ccmF</i> (His173Ala):His6GH              | This work |
| pRGK435 | --                           | pBAD <i>ccmF</i> (His173Gly):His6GH              | This work |
| pRGK436 | --                           | pBAD <i>ccmF</i> (His173Cys):His6GH              | This work |
| pRGK437 | --                           | pBAD <i>ccmF</i> (His173Met):His6GH              | This work |
| pRGK438 | --                           | pBAD <i>ccmF</i> (His173Tyr):His6GH              | This work |
| pRGK439 | --                           | pBAD <i>ccmF</i> (His303Ala):His6GH              | This work |
| pRGK440 | --                           | pBAD <i>ccmF</i> (His303Gly):His6GH              | This work |
| pRGK441 | --                           | pBAD <i>ccmF</i> (His303Cys):His6GH              | This work |
| pRGK442 | --                           | pBAD <i>ccmF</i> (His303Met):His6GH              | This work |
| pRGK443 | --                           | pBAD <i>ccmF</i> (His303Tyr):His6GH              | This work |

| Primer               | Sequence (5'-3')                             | Plasmid Constructed           |
|----------------------|----------------------------------------------|-------------------------------|
| delABloop_BgIII_Fw d | GCCAGA TCTATGTGGAAAACTG                      | pRGK427                       |
| delABloop_BgIII_Rev  | GATAGA TCTACGCGGAACCA GATC                   | pRGK427                       |
| ccmE_H130A_Fw d      | GCGAAA GAA GTGCTGGCGAAA GCCGATGAAAACTATACGCC | pRGK428                       |
| ccmE_H130A_Rev       | GGCGTATAGTTTTCATCGGCTTTCCGCCA GCACTTCTTTTCGC | pRGK428                       |
| ccmF_H173A_Fw d      | CCGGGGCTGATCTTCGCTCCGCCTCTGCTTT              | pRGK429<br>pRGK434            |
| ccmF_H173A_Rev       | AAAGCAGAGGCGGAGCGAA GATCAGCCCCGG             | pRGK429<br>pRGK434            |
| ccmF_H173G_Fw d      | CCGGGGCTGATCTTCGGTCCGCCTCTGCTTT              | pRGK435                       |
| ccmF_H173G_Rev       | AAAGCAGAGGCGGACC GAA GATCAGCCCCGG            | pRGK435                       |
| ccmF_H173C_Fw d      | GATCCGGGGCTGATCTTCTGTCCGCCTCTGCTTTATA        | pRGK436                       |
| ccmF_H173C_Rev       | TATAAAGCAGAGGCGGACAGAA GATCAGCCCCGGATC       | pRGK436                       |
| ccmF_H173M_Fw d      | GGATCCGGGGCTGATCTTCATGCCGCCTCTGCTTTATATGG    | pRGK437                       |
| ccmF_H173M_Rev       | CCATAAAGCAGAGGCGGCA TGAAGATCAGCCCCGGATCC     | pRGK437                       |
| ccmF_H173Y_Fw d      | CGGGGCTGATCTTCTATCCGCCTCTGCTT                | pRGK438                       |
| ccmF_H173Y_Rev       | AAAGCAGAGGCGGATA GAAGATCAGCCCCG              | pRGK438                       |
| ccmF_H303A_Fw d      | GGCGTGCTGGTATCGGTA GCCGCGTTTGCG              | pRGK431<br>pRGK433<br>pRGK439 |
| ccmF_H303A_Rev       | CGCAAACGCGGCTACCGATA CCA GCA CGCC            | pRGK431<br>pRGK433<br>pRGK439 |
| ccmF_H303G_Fw d      | GGCGTGCTGGTATCGGTA GCCGCGTTTGCG              | pRGK440                       |
| ccmF_H303G_Rev       | CGCAAACGCGCCTACCGATA CCA GCA CGCC            | pRGK440                       |
| ccmF_H303C_Fw d      | CGGCGTGCTGGTATCGGTA TGCGCGTTTGCGT            | pRGK441                       |
| ccmF_H303C_Rev       | ACGCAAACGCGCATACCGATA CCA GCA CGCCG          | pRGK441                       |
| ccmF_H303M_Fw d      | CGGCGTGCTGGTATCGGTAATGGCGTTTGCGTCTGA         | pRGK442                       |
| ccmF_H303M_Rev       | TCA GACGCAAACGCCATTACCGATA CCA GCA CGCCG     | pRGK442                       |
| ccmF_H303Y_Fw d      | GGCGTGCTGGTATCGGTA TGCGTTTGCGTCTG            | pRGK443                       |
| ccmF_H303Y_Rev       | CAGACGCAAACGCATATACCGATA CCA GCA CGCC        | pRGK443                       |
| ccmF_H261A_Fw d      | GGACTGCGCTGATGGCCTCA CTGGCGGTCA              | pRGK430                       |
| ccmF_H261A_Rev       | TGACCGCCAGTGAGGCCATGCGCGCAGTCC               | pRGK430                       |
| ccmF_H491A_Fw d      | GGGATGGTGGCGGCTGCCCTTGGGCTGGC                | pRGK432                       |
| ccmF_H491A_Rev       | GCCA GCCAAAGGGCAGCCGCCACCATCCC               | pRGK432                       |

## REFERENCES

- (1) San Francisco, B., Bretsnyder, E. C., Rodgers, K. R., and Kranz, R. G. (2011) Heme ligand identification and redox properties of the cytochrome c synthetase, CcmF. *Biochemistry* 50, 10974-85.
- (2) Feissner, R. E., Richard-Fogal, C. L., Frawley, E. R., Loughman, J. A., Earley, K. W., and Kranz, R. G. (2006) Recombinant cytochromes c biogenesis systems I and II and analysis of haem delivery pathways in *Escherichia coli*. *Mol Microbiol* 60, 563-77.
- (3) Richard-Fogal, C. L., Frawley, E. R., Bonner, E. R., Zhu, H., San Francisco, B., and Kranz, R. G. (2009) A conserved haem redox and trafficking pathway for cofactor attachment. *Embo J* 28, 2349-59.
